# Supplementary material
Source: PubMed Central journal article supplement (PMC6439674)
Supplement: jama-321-946-s003.pdf [file jama-321-946-s003.pdf]

## Supplementary Online Content

Fleischer DM, Greenhawt M, Sussman G, et al. Effect of epicutaneous immunotherapy vs placebo on reaction to peanut protein ingestion among children with peanut allergy: the PEPITES randomized clinical trial. *JAMA*. doi:10.1001/jama.2019.1113

**eFigure 1.** Study Design

**eFigure 2.** Interscapular Patch Placement

**eFigure 3.** (A) Differences in Response Rates Between the Peanut-Patch and Placebo-Patch Groups; (B) Distribution in Eliciting Dose Changes From Baseline at Month 12 (ITT Population)

**eFigure 4.** Immunologic Correlates Over Time by Treatment Group

**eFigure 5.** Local Skin Reactions in the Peanut-Patch Group Over Time per Investigator's Assessment

**eTable 1.** Symptom Scoring During Oral Food Challenge

**eTable 2.** Pre-defined Hierarchical Order for Analysis of Efficacy Endpoints

**eTable 3.** Post Hoc Analysis Using Site Treated as a Random Effect

**eTable 4.** Cumulative Reactive Dose (CRD) of Peanut Protein by Treatment Group (ITT Population)

**eTable 5.** Treatment Emergent Adverse Event Rates by System Organ Class and Preferred Term, by Treatment Group (Safety Population) with Exposure Adjusted Event Rate

**eTable 6.** Summary of Treatment Emergent Adverse Events Considered Related to the Patch by Treatment Group

**eTable 7.** Summary of Possibly Related, Probably Related, or Related Anaphylaxis Events Occurring in Peanut-Patch Participants

This supplementary material has been provided by the authors to give readers additional information about their work.

**eFigure 1. Study Design**

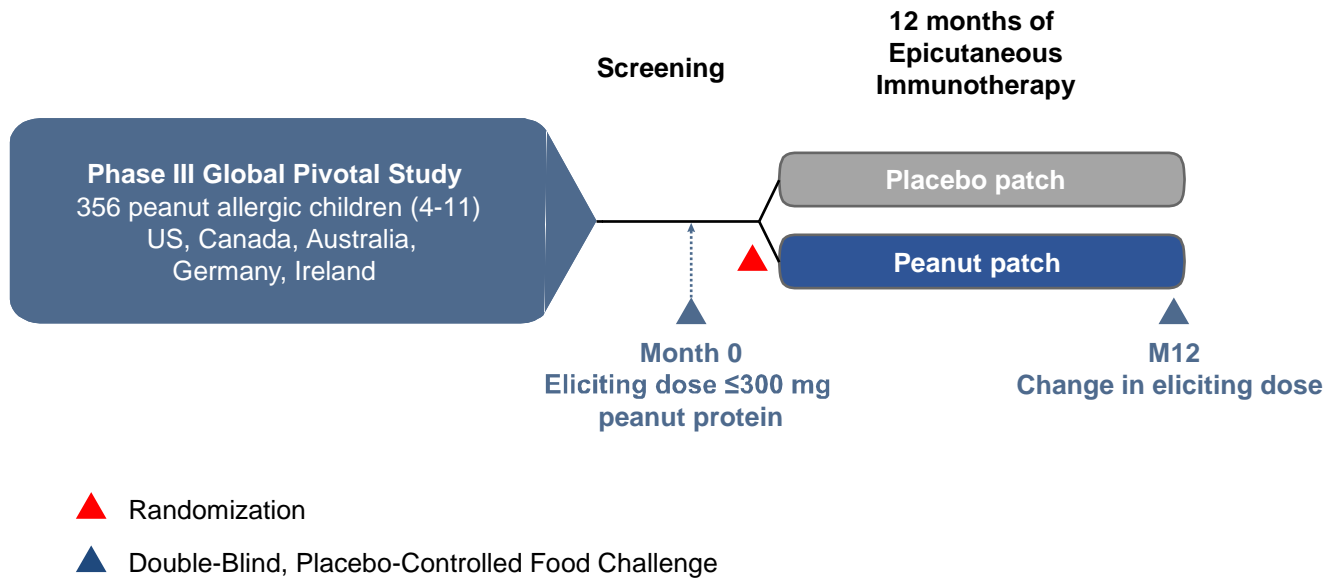

## eFigure 2. Interscapular Patch Placement

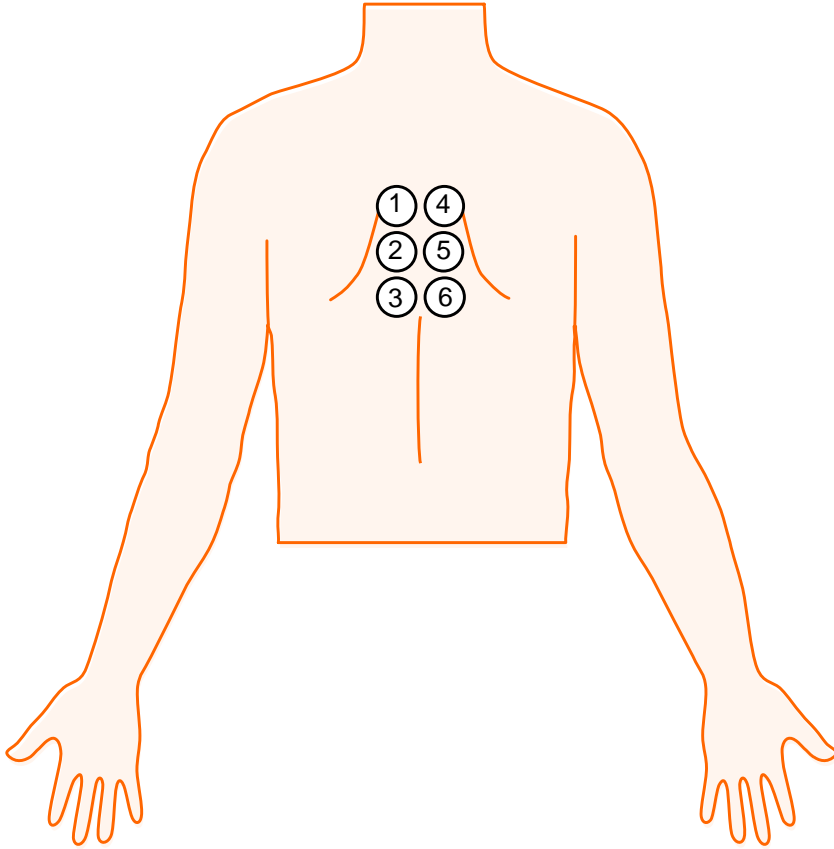

The location of patch application was the interscapular area of the back of the participants. There were 6 zones for applying the patch, 3 on each side of the spine. The first patch was applied on zone 1, the second on zone 2 (after removal of the first patch), and so forth, until all 6 zones had been used. After zone 6, dosing restarted with zone 1 and continued sequentially, as described.

**eFigure 3. (A) Differences in Response Rates Between the Peanut-Patch and Placebo-Patch Groups; (B) Distribution in Eliciting Dose Changes From Baseline at Month 12 (ITT Population)**

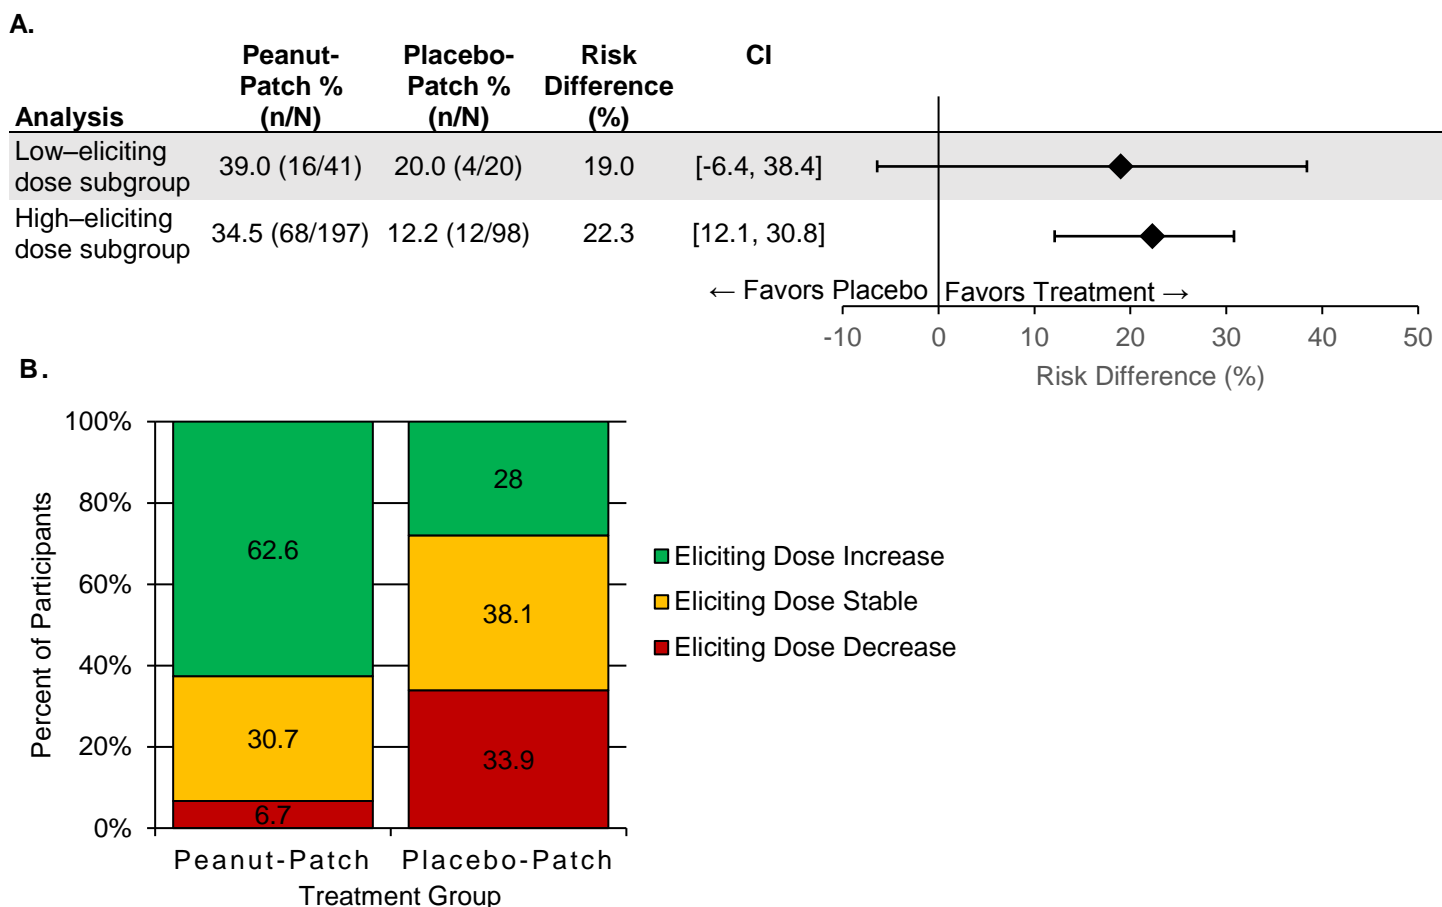

Abbreviations: CI, 95% confidence interval.

### Response Rates Within Baseline Eliciting Dose Subgroups

Response rates based on eliciting dose changes with peanut patch were numerically greater than with placebo patch in both subgroups: 39% in the low-eliciting dose subgroup (n=41) and 34.5% in the high-eliciting dose subgroup (n=197). The effect size in favor of peanut patch was comparable across subgroups (19% in the low-eliciting dose subgroup, 22.3% in the high-eliciting dose subgroup), but not statistically significant in the low-eliciting dose subgroup (eFigure 3A).

### Eliciting Dose and Cumulative Reactive Dose

In a post-hoc analysis, 62.6% of participants in the peanut-patch group compared to 28% in the placebo-patch group experienced an increased eliciting dose at 12 months, and 53.1% of participants on active treatment increased their baseline eliciting dose from  $\leq 100$ mg to  $\geq 300$ mg, vs only 19% on placebo-patch. Conversely, 33.9% of participants in the placebo-patch group vs 6.7% in the peanut-patch group demonstrated an eliciting dose decrease (eFigure 3B). Median baseline cumulative reactive dose of peanut protein was 144mg (Q1, Q3: 44, 444) in both groups (eTable 3). After 12 months, the estimated median cumulative reactive dose difference between the peanut-patch and placebo-patch groups was 297mg.

## Immunologic Correlates

Median relative changes from baseline in peanut-specific immunologic markers over time for both groups are shown in eFigure 4. The median increase from baseline in peanut-specific IgE was greater in the peanut-patch vs placebo-patch group, respectively, at month 3 (70.1 kilounits of antibody per liter [kU<sub>A</sub>/L] vs 9.8 kU<sub>A</sub>/L) and month 6 (27.4 kU<sub>A</sub>/L vs 1.32 kU<sub>A</sub>/L). However, at month 12, peanut-specific IgE returned to near baseline in both groups (1.1 kU<sub>A</sub>/L vs -1.1 kU<sub>A</sub>/L). In contrast, mean peanut skin prick test wheal diameter decreased from baseline by month 3 (-3.03mm vs -1.03mm), month 6 (-3.5mm vs -1.21mm), and month 12 (-3.48mm vs -0.77mm), though in the peanut-patch group the decrease in the size of the skin test did not progress after month 6.

Levels of peanut-specific IgE to component proteins were also measured at the same time points as noted above. Trends were most prominent for Ara h 1. Ara h 1 sIgE levels in the peanut-patch group were markedly increased from baseline at month 3 (median change in active vs placebo, respectively: 16.62 kU<sub>A</sub>/L vs 0.35 kU<sub>A</sub>/L), as well as at month 6 (8.53 kU<sub>A</sub>/L vs 0.02 kU<sub>A</sub>/L) and at month 12 (1.47 kU<sub>A</sub>/L vs -0.25 kU<sub>A</sub>/L). Similar to total peanut IgE, Ara h 1 levels in the peanut-patch group peaked at month 3 and then regressed at month 6 and month 12, but the peanut-patch group remained highly discernable based on Ara h 1 values vs. placebo at all time points, and the decline was less notable than with total peanut IgE. The same trends were present for Ara h 2 and Ara h 3, but more minimally so compared to either Ara h 1 or total peanut IgE. No discernable change was noted for either Ara h 8 or Ara h 9.

Median peanut-specific IgG4 increased over time in the peanut-patch group (change from baseline at month 3: 0.81 mg/L; month 6: 1.79 mg/L; month 12: 3.27 mg/L), while levels remained unchanged from baseline in the placebo-patch group. The change from baseline in peanut-specific IgG4 was greater at all time points with peanut patch vs placebo patch, and the groups were highly distinguished by this marker given a flat trend in the placebo arm. IgG4 to peanut component proteins mentioned above were also measured. For both Ara h 1 and Ara h 2 IgG4, an identical trend to total IgG4 was noted between peanut-patch and placebo groups at all time points, which readily distinguished the groups. This upward trend was highest for Ara h 2 IgG4, followed by total peanut IgG4, then Ara h 1 IgG4. Total peanut IgE to IgG4 ratio was also assessed, and showed a marked decrease in the peanut-patch group compared to baseline over the 12 months of treatment at all time points measured, as well as a marked decrease at all time points measured in the peanut-patch group compared to placebo at all time points, which also readily distinguished those on active therapy vs. placebo.

**eFigure 4. Immunologic Correlates Over Time by Treatment Group**

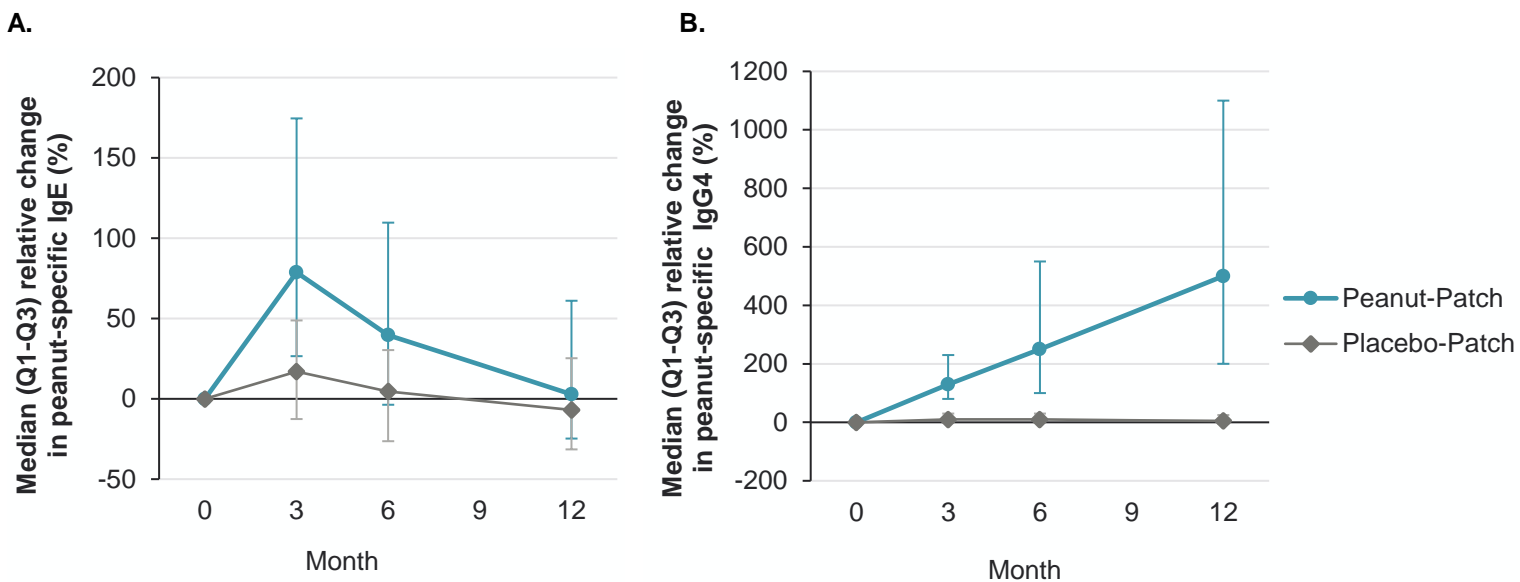

Abbreviations: IgE, immunoglobulin E; IgG4, immunoglobulin G4; Q1, first quartile; Q3, third quartile.

**eFigure 5. Local Skin Reactions in the Peanut-Patch Group Over Time per Investigator’s Assessment**

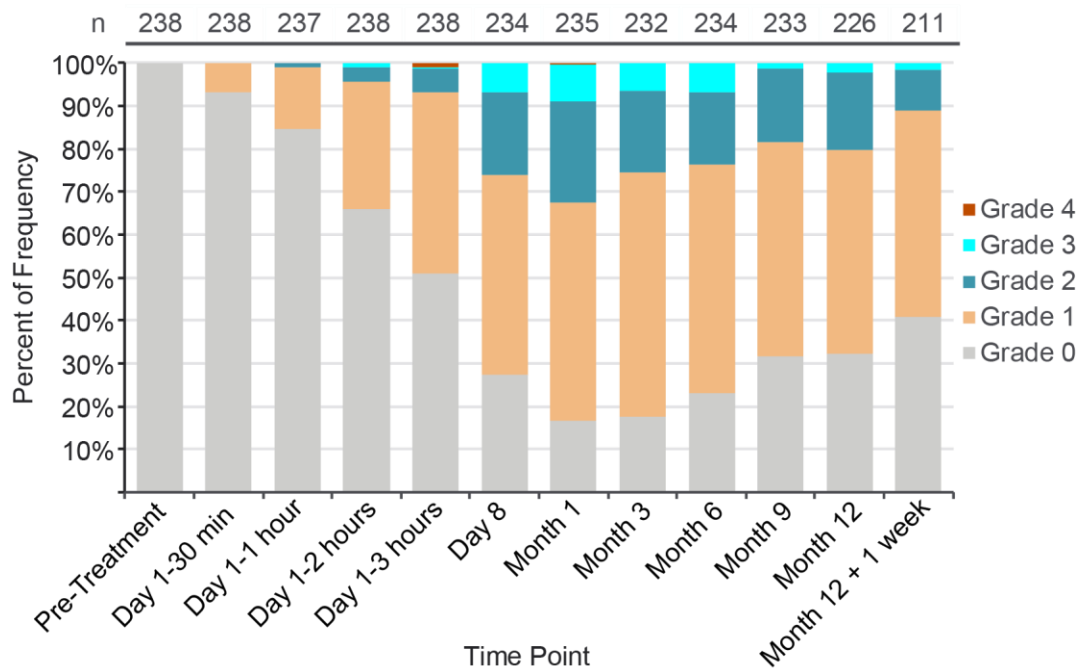

Participants are still receiving treatment at month 12 + 1 week.

Reaction definitions: Grade 0: negative; Grade 1: only erythema, or erythema + infiltration; Grade 2: erythema, few papules; Grade 3: erythema, many or spreading papules; Grade 4: erythema, vesicles.

**eTable 1. Symptom Scoring During Oral Food Challenge**

| Symptom                   | Scoring                                                                                                                                                                                                                                                                                                                                                                                                                                                                             |
|---------------------------|-------------------------------------------------------------------------------------------------------------------------------------------------------------------------------------------------------------------------------------------------------------------------------------------------------------------------------------------------------------------------------------------------------------------------------------------------------------------------------------|
| Skin                      |                                                                                                                                                                                                                                                                                                                                                                                                                                                                                     |
| Erythematous rash         | Percentage of area involved                                                                                                                                                                                                                                                                                                                                                                                                                                                         |
| Pruritus                  | 0 = Absent<br>1 = Mild: occasional scratching<br>2 = Moderate: scratching continuously for >2 minutes at a time<br>3 = Severe: hard, continuous scratching, excoriations                                                                                                                                                                                                                                                                                                            |
| Urticaria/Angioedema      | 0 = Absent<br>1 = Mild: <3 hives, or mild lip edema<br>2 = Moderate: <10 hives but >3, or significant lip or face edema<br>3 = Severe: generalized involvement                                                                                                                                                                                                                                                                                                                      |
| Rash                      | 0 = Absent<br>1 = Mild: few areas of faint erythema<br>2 = Moderate: areas of erythema (>20% and <50%), macular and raised rash<br>3 = Severe: generalized marked erythema (>50%), extensive raised lesions (>25%)                                                                                                                                                                                                                                                                  |
| Upper respiratory         |                                                                                                                                                                                                                                                                                                                                                                                                                                                                                     |
| Sneezing/Itching          | 0 = Absent<br>1 = Mild: rare bursts<br>2 = Moderate: bursts <10, intermittent rubbing of nose/eyes/external ear canals<br>3 = Severe: continuous rubbing of nose/eyes, periocular swelling and/or long bursts of sneezing                                                                                                                                                                                                                                                           |
| Nasal congestion          | 0 = Absent<br>1 = Mild: some hindrance to breathing<br>2 = Moderate: nostrils feel blocked, breathing through mouth most of time<br>3 = Severe: nostrils occluded                                                                                                                                                                                                                                                                                                                   |
| Rhinorrhea                | 0 = Absent<br>1 = Mild: occasional sniffing<br>2 = Moderate: frequent sniffing, requires tissues<br>3 = Severe: nose runs freely despite sniffing and tissues                                                                                                                                                                                                                                                                                                                       |
| Laryngeal                 | 0 = Absent<br>1 = Mild: throat clearing, occasional cough<br>2 = Moderate: hoarseness, frequent dry cough<br>3 = Severe: inspiratory stridor                                                                                                                                                                                                                                                                                                                                        |
| Lower respiratory         |                                                                                                                                                                                                                                                                                                                                                                                                                                                                                     |
| Wheezing                  | 0 = Absent<br>1 = Mild: expiratory wheezing to auscultation<br>2 = Moderate: dyspnea, inspiratory and expiratory wheezing<br>3 = Severe: dyspnea, use of accessory muscles, audible wheezing                                                                                                                                                                                                                                                                                        |
| Gastrointestinal          |                                                                                                                                                                                                                                                                                                                                                                                                                                                                                     |
| Subjective complaints     | 0 = Absent<br>1 = Mild: itchy mouth/throat, c/o nausea, abdominal pain, no change in activity<br>2 = Moderate: frequent c/o nausea or abdominal pain, decreased activity<br>3 = Severe: patient in bed; crying, notably distressed                                                                                                                                                                                                                                                  |
| Objective complaints      | 0 = Absent<br>1 = Mild: 1 episode of emesis or diarrhea<br>2 = Moderate: 2-3 episodes of emesis or diarrhea or 1 of each<br>3 = Severe: >3 episodes of emesis or diarrhea or 2 of each                                                                                                                                                                                                                                                                                              |
| Cardiovascular/Neurologic |                                                                                                                                                                                                                                                                                                                                                                                                                                                                                     |
|                           | 0 = Normal: heart rate or BP for age/baseline<br>1 = Mild: color change, subjective response (weak, dizzy), or tachycardia, mental status change, mild hypotension (weak rapid pulse and/or 10-20% drop in BP from baseline)<br>2 = Moderate: drop in BP >20% from baseline, significant change in mental status, light-headedness, feeling of "impending doom"<br>3 = Severe: cardiovascular collapse, signs of impaired circulation, unconsciousness, bradycardia, cardiac arrest |

Abbreviation: BP, blood pressure.

**eTable 2. Pre-defined Hierarchical Order for Analysis of Efficacy Endpoints**

| Order | Efficacy endpoints (at M12)                                                                                                                    | Population or sub-group                                         | Success criterion              | Method / SAS Procedure                                            |
|-------|------------------------------------------------------------------------------------------------------------------------------------------------|-----------------------------------------------------------------|--------------------------------|-------------------------------------------------------------------|
| 1     | Difference in percentages of treatment responders                                                                                              | ITT Overall                                                     | 95% CI lower bound $\geq 15\%$ | 2-sided Newcombe 95% CI (SAS FREQ procedure with RISKDIFF option) |
| 2     | Difference in percentages of treatment responders                                                                                              | ITT Screening ED subgroup 2 ( $>10\text{mg}$ ) <sup>a</sup>     | 95% CI lower bound $>0\%$      | 2-sided Newcombe 95% CI (SAS FREQ procedure with RISKDIFF option) |
| 3     | Difference in percentages of treatment responders                                                                                              | ITT Screening ED subgroup 1 ( $\leq 10\text{mg}$ ) <sup>b</sup> | 95% CI lower bound $>0\%$      | 2-sided Newcombe 95% CI (SAS FREQ procedure with RISKDIFF option) |
| 4     | Cumulative reactive dose                                                                                                                       | ITT Overall                                                     | $p \leq 0.05$                  | ANCOVA                                                            |
| 5     | Peanut protein ED                                                                                                                              | ITT Overall                                                     | $p \leq 0.05$                  | ANCOVA                                                            |
| 6     | Difference in percentages of treatment responders                                                                                              | ITT Age group 6-11 years of age                                 | 95% CI lower bound $>0\%$      | 2-sided Newcombe 95% CI (SAS FREQ procedure with RISKDIFF option) |
| 7     | Difference in percentages of treatment responders                                                                                              | ITT Age group 4-5 years of age                                  | 95% CI lower bound $>0\%$      | 2-sided Newcombe 95% CI (SAS FREQ procedure with RISKDIFF option) |
| 8     | Difference in percentage of participants responsive to a cumulative dose $\geq 1,444$ mg peanut protein                                        | ITT Overall                                                     | 95% CI lower bound $>0\%$      | 2-sided Newcombe 95% CI (SAS FREQ procedure with RISKDIFF option) |
| 9     | Difference in percentage of participants unresponsive to a cumulative dose $\geq 1,444$ mg peanut protein                                      | ITT Overall                                                     | 95% CI lower bound $>0\%$      | 2-sided Newcombe 95% CI (SAS FREQ procedure with RISKDIFF option) |
| 10    | Cumulative reactive dose                                                                                                                       | ITT Screening ED subgroup 2 <sup>a</sup>                        | $p \leq 0.05$                  | ANCOVA                                                            |
| 11    | Peanut protein ED                                                                                                                              | ITT Screening ED subgroup 2 <sup>a</sup>                        | $p \leq 0.05$                  | ANCOVA                                                            |
| 12    | Cumulative reactive dose                                                                                                                       | ITT Screening ED subgroup 1 <sup>b</sup>                        | $p \leq 0.05$                  | ANCOVA                                                            |
| 13    | Peanut protein ED                                                                                                                              | ITT Screening ED subgroup 1 <sup>b</sup>                        | $p \leq 0.05$                  | ANCOVA                                                            |
| 14    | Difference in percentage of participants passing the challenge (percentage of participants unresponsive to the highest dose of peanut protein) | ITT Overall                                                     | 95% CI lower bound $>0\%$      | 2-sided Newcombe 95% CI (SAS FREQ procedure with RISKDIFF option) |

Abbreviations: CI=Confidence Interval; ANCOVA = Analysis of covariance; ED = Eliciting dose; ITT = Intention-to-treat, comprised of all participants who were randomized.

<sup>a</sup> Screening ED subgroup 2 = high-eliciting dose subgroup: participants who had a baseline eliciting dose of  $>10\text{mg}$ - $300\text{mg}$  peanut protein

<sup>b</sup> Screening ED subgroup 1 = low-eliciting dose subgroup: participants who had a baseline eliciting dose of  $\leq 10\text{mg}$  of peanut protein



**eTable 3. Post Hoc Analysis Using Site Treated as a Random Effect**

|                                 | Mixed Model (Site as Random Effect)                                     | Independent Model (Unadjusted for Site)                                 |
|---------------------------------|-------------------------------------------------------------------------|-------------------------------------------------------------------------|
| Model                           | Difference of treatment group Least Square means Estimate [Wald 95% CI] | Difference of treatment group Least Square means Estimate [Wald 95% CI] |
| Distribution=bin, link=id       | did not converge                                                        | 21.7 [13.1 - 30.4]                                                      |
| Distribution=normal, link=id    | 21.5 [11.8 - 31.2]                                                      | 21.7 [12.1 - 31.4]                                                      |
| Distribution=bin, link=logit    | 1.24 [0.65 - 1.84]                                                      | 1.25 [0.66 - 1.84]                                                      |
| Distribution=normal, link=logit | 1.20 [0.52 - 1.88]                                                      | 1.25 [0.53 - 1.96]                                                      |

**eTable 4. Cumulative Reactive Dose (CRD)<sup>a</sup> of Peanut Protein by Treatment Group (ITT Population)**

| CRD of Peanut Protein (mg) | Peanut Patch (n = 238) | Placebo Patch (n = 118) | Difference in Median CRD (mg) <sup>b</sup> |
|----------------------------|------------------------|-------------------------|--------------------------------------------|
| Baseline                   |                        |                         | Not calculated                             |
| Mean (SD)                  | 211.7 (172.3)          | 212.5 (186.6)           |                                            |
| Median (Q1, Q3)            | 144 (44, 444)          | 144 (44, 444)           |                                            |
| Range                      | 1–547                  | 1–744                   |                                            |
| Month 12                   |                        |                         | 297                                        |
| Mean (SD)                  | 905.7 (1076.6)         | 361.0 (655.8)           |                                            |
| Median (Q1, Q3)            | 444 (144, 1444)        | 144.0 (44, 444)         |                                            |
| Range                      | 1–3444                 | 1–3444                  |                                            |

Abbreviations: ITT, intention-to-treat, comprised of all participants who were randomized; Q1, first quartile; Q3, third quartile; SD, standard deviation.

<sup>a</sup>The cumulative reactive dose is the sum of all doses administered during a double-blind, placebo-controlled food challenge.

<sup>b</sup>Hodges and Lehmann estimate of the difference in median CRDs at month 12 between treatment groups.

**eTable 5. Treatment Emergent Adverse Event Rates by System Organ Class and Preferred Term, by Treatment Group (Safety Population) with Exposure Adjusted Event Rate**

| Category                                                              | Peanut Patch (n=238) |        |                  |                                           | Placebo Patch (n=118) |        |                  |                                           |
|-----------------------------------------------------------------------|----------------------|--------|------------------|-------------------------------------------|-----------------------|--------|------------------|-------------------------------------------|
|                                                                       | No.                  | (%)    | Number of Events | Exposure adjusted event rate <sup>a</sup> | No.                   | (%)    | Number of Events | Exposure adjusted event rate <sup>a</sup> |
| <b>Any:</b>                                                           |                      |        |                  |                                           |                       |        |                  |                                           |
| <b>TEAEs</b>                                                          | 227                  | (95.4) | 2160             | 9.16                                      | 105                   | (89)   | 810              | 7.031                                     |
| <b>Mild TEAEs<sup>b</sup></b>                                         | 220                  | (92.4) | 1683             | 7.137                                     | 97                    | (82.2) | 677              | 5.877                                     |
| <b>Moderate TEAEs<sup>c</sup></b>                                     | 127                  | (53.4) | 440              | 1.866                                     | 53                    | (44.9) | 131              | 1.137                                     |
| <b>Severe TEAEs<sup>d</sup></b>                                       | 14                   | (5.9)  | 37               | 0.157                                     | 2                     | (1.7)  | 2                | 0.017                                     |
| <b>Serious TEAEs<sup>e</sup></b>                                      | 10                   | (4.2)  | 12               | 0.051                                     | 6                     | (5.1)  | 6                | 0.052                                     |
| <b>TEAEs considered related to patch<sup>f</sup></b>                  | 142                  | (59.7) | 569              | 2.413                                     | 41                    | (34.7) | 157              | 1.363                                     |
| <b>TEAEs reported as related</b>                                      | 125                  | (52.5) | 483              | 2.048                                     | 33                    | (28)   | 138              | 1.198                                     |
| <b>TEAEs reported as probably related</b>                             | 27                   | (11.3) | 41               | 0.174                                     | 3                     | (2.5)  | 4                | 0.035                                     |
| <b>TEAEs reported as possibly related</b>                             | 22                   | (9.2)  | 45               | 0.191                                     | 11                    | (9.3)  | 15               | 0.13                                      |
| <b>TEAEs considered unrelated to patch</b>                            | 220                  | (92.4) | 1591             | 6.747                                     | 102                   | (86.4) | 653              | 5.668                                     |
| <b>TEAEs reported as unlikely related</b>                             | 73                   | (30.7) | 234              | 0.992                                     | 43                    | (36.4) | 147              | 1.276                                     |
| <b>TEAEs reported as unrelated</b>                                    | 216                  | (90.8) | 1357             | 5.755                                     | 100                   | (84.7) | 506              | 4.392                                     |
| <b>Serious TEAEs considered related to patch<sup>f</sup></b>          | 3                    | (1.3)  | 4                | 0.017                                     | 0                     | 0      | 0                | 0                                         |
| <b>TEAEs leading to permanent patch discontinuation</b>               | 4                    | (1.7)  | 4                | 0.017                                     | 0                     | 0      | 0                | 0                                         |
| <b>TEAEs leading to temporary patch discontinuation</b>               | 32                   | (13.4) | 55               | 0.233                                     | 11                    | (9.3)  | 16               | 0.139                                     |
| <b>TEAEs leading to death</b>                                         | 0                    | 0      | 0                | 0                                         | 0                     | 0      | 0                | 0                                         |
| <b>Severe TEAEs considered related to patch<sup>f</sup></b>           | 8                    | (3.4)  | 30               | 0.127                                     | 1                     | (0.8)  | 1                | 0.009                                     |
| <b>Patch-induced local TEAEs</b>                                      | 137                  | (57.6) | 508              | 2.154                                     | 32                    | (27.1) | 138              | 1.198                                     |
| <b>Systemic allergic TEAE considered related to patch<sup>f</sup></b> | 9                    | (3.8)  | 11               | 0.047                                     | 2                     | (1.7)  | 2                | 0.017                                     |
| <b>Severe patch-induced local TEAEs</b>                               | 8                    | (3.4)  | 29               | 0.123                                     | 1                     | (0.8)  | 1                | 0.009                                     |
| <b>TEAEs leading to an epinephrine intake</b>                         | 22                   | (9.2)  | 27               | 0.115                                     | 4                     | (3.4)  | 5                | 0.043                                     |
| <b>TEAEs considered related to patch<sup>f</sup></b>                  | 7                    | (2.9)  | 7                | 0.03                                      | 1                     | (0.8)  | 1                | 0.009                                     |
| <b>TEAEs considered unrelated to patch</b>                            | 15                   | (6.3)  | 20               | 0.085                                     | 4                     | (3.4)  | 4                | 0.035                                     |

Abbreviation: n, number of participants in treatment group; TEAE, treatment-emergent adverse event.

<sup>a</sup>Exposure adjusted event rate based on the number of events divided by the total exposure of participants (235.8 patient-year for Peanut-Patch Group and 115.2 for Placebo Group)

<sup>b</sup>Mild: the adverse event was transient and easily tolerated by the participant.

<sup>c</sup>Moderate: the adverse event caused discomfort and interference with the participant's general condition.

<sup>d</sup>Severe: the adverse event caused considerable interference with the participant's general condition and may have been incapacitating.

<sup>e</sup>Serious: any untoward medical occurrence that at any dose results in death; is life-threatening, meaning that the participant is at risk of death at the time of the event but does not mean that the event hypothetically might have caused death if it were more severe; requires hospitalization (overnight or longer) or prolongation of existing hospitalization; results in persistent or significant disability or incapacity; is a congenital anomaly or birth defect; is an important medical event that may not be immediately life-threatening or result in death or hospitalization but that may jeopardize the participant or require intervention to prevent one of the above outcomes. Examples of such events are intensive treatment in an emergency room or at home for

allergic bronchospasm; blood dyscrasias or convulsions that do not result in hospitalization; or development of drug dependency or drug abuse. Medical and scientific judgment should be exercised in deciding whether a case is serious and whether expedited reporting is appropriate.

<sup>†</sup>Considered related to study treatment when reported as possibly related, probably related or related. Considered unrelated to peanut-patch when reported as unlikely related or unrelated.

**eTable 6. Summary of Treatment Emergent Adverse Events Considered Related to the Patch by Treatment Group**

| System Organ Class Preferred Term                           | Peanut Patch 250µg (n=238) |        |                  |                                           | Placebo Patch (n=118) |        |                  |                                           |
|-------------------------------------------------------------|----------------------------|--------|------------------|-------------------------------------------|-----------------------|--------|------------------|-------------------------------------------|
|                                                             | No.                        | (%)    | Number of Events | Exposure adjusted Event Rate <sup>b</sup> | No.                   | (%)    | Number of Events | Exposure adjusted Event Rate <sup>b</sup> |
| <b>Any TEAE considered related to Patch<sup>a</sup></b>     | 142                        | (59.7) | 569              | 2.413                                     | 41                    | (34.7) | 157              | 1.363                                     |
| <b>General disorders and administration site conditions</b> | 137                        | (57.6) | 510              | 2.163                                     | 32                    | (27.1) | 138              | 1.198                                     |
| <b>Administration site conditions</b>                       | 137                        | (57.6) | 508              | 2.154                                     | 32                    | (27.1) | 138              | 1.198                                     |
| Pruritus <sup>c</sup>                                       | 82                         | (34.5) | 152              | 0.645                                     | 14                    | (11.9) | 30               | 0.26                                      |
| Erythema <sup>c</sup>                                       | 67                         | (28.2) | 118              | 0.5                                       | 20                    | (16.9) | 54               | 0.469                                     |
| Swelling <sup>c</sup>                                       | 38                         | (16)   | 86               | 0.365                                     | 2                     | (1.7)  | 18               | 0.156                                     |
| Eczema                                                      | 25                         | (10.5) | 29               | 0.123                                     | 6                     | (5.1)  | 18               | 0.156                                     |
| Reaction                                                    | 21                         | (8.8)  | 29               | 0.123                                     | 2                     | (1.7)  | 5                | 0.043                                     |
| Urticaria                                                   | 15                         | (6.3)  | 23               | 0.098                                     | 0                     | 0      | 0                | 0                                         |
| Dermatitis                                                  | 10                         | (4.2)  | 27               | 0.115                                     | 0                     | 0      | 0                | 0                                         |
| Irritation                                                  | 8                          | (3.4)  | 10               | 0.042                                     | 2                     | (1.7)  | 3                | 0.026                                     |
| Rash                                                        | 6                          | (2.5)  | 6                | 0.025                                     | 0                     | 0      | 0                | 0                                         |
| Edema                                                       | 5                          | (2.1)  | 7                | 0.03                                      | 1                     | (0.8)  | 5                | 0.043                                     |
| Vesicles                                                    | 2                          | (0.8)  | 4                | 0.017                                     | 1                     | (0.8)  | 1                | 0.009                                     |
| Dryness                                                     | 2                          | (0.8)  | 11               | 0.047                                     | 0                     | 0      | 0                | 0                                         |
| Discomfort                                                  | 1                          | (0.4)  | 1                | 0.004                                     | 1                     | (0.8)  | 1                | 0.009                                     |
| Pain                                                        | 1                          | (0.4)  | 1                | 0.004                                     | 1                     | (0.8)  | 1                | 0.009                                     |
| Papules                                                     | 1                          | (0.4)  | 1                | 0.004                                     | 1                     | (0.8)  | 1                | 0.009                                     |
| Discharge                                                   | 1                          | (0.4)  | 1                | 0.004                                     | 0                     | 0      | 0                | 0                                         |
| Discoloration                                               | 1                          | (0.4)  | 1                | 0.004                                     | 0                     | 0      | 0                | 0                                         |
| Erosion                                                     | 1                          | (0.4)  | 1                | 0.004                                     | 0                     | 0      | 0                | 0                                         |
| Inflammation                                                | 0                          | 0      | 0                | 0                                         | 1                     | (0.8)  | 1                | 0.009                                     |
| <b>General disorders</b>                                    | 2                          | (0.8)  | 2                | 0.008                                     | 0                     | 0      | 0                | 0                                         |
| Fatigue                                                     | 2                          | (0.8)  | 2                | 0.008                                     | 0                     | 0      | 0                | 0                                         |
| <b>Skin and subcutaneous tissue disorders</b>               | 13                         | (5.5)  | 17               | 0.072                                     | 10                    | (8.5)  | 14               | 0.122                                     |
| Urticaria                                                   | 5                          | (2.1)  | 8                | 0.034                                     | 2                     | (1.7)  | 3                | 0.026                                     |
| Eczema                                                      | 2                          | (0.8)  | 2                | 0.008                                     | 3                     | (2.5)  | 5                | 0.043                                     |
| Dermatitis atopic                                           | 1                          | (0.4)  | 1                | 0.004                                     | 1                     | (0.8)  | 1                | 0.009                                     |
| Erythema                                                    | 1                          | (0.4)  | 1                | 0.004                                     | 1                     | (0.8)  | 2                | 0.017                                     |
| Papule                                                      | 1                          | (0.4)  | 1                | 0.004                                     | 1                     | (0.8)  | 1                | 0.009                                     |
| Generalized erythema                                        | 1                          | (0.4)  | 1                | 0.004                                     | 0                     | 0      | 0                | 0                                         |
| Pruritus generalized                                        | 1                          | (0.4)  | 1                | 0.004                                     | 0                     | 0      | 0                | 0                                         |
| Rash                                                        | 1                          | (0.4)  | 1                | 0.004                                     | 0                     | 0      | 0                | 0                                         |
| Rash generalized                                            | 1                          | (0.4)  | 1                | 0.004                                     | 0                     | 0      | 0                | 0                                         |
| Pruritus                                                    | 0                          | 0      | 0                | 0                                         | 1                     | (0.8)  | 1                | 0.009                                     |
| Skin reaction                                               | 0                          | 0      | 0                | 0                                         | 1                     | (0.8)  | 1                | 0.009                                     |
| <b>Immune system disorders</b>                              | 12                         | (5)    | 15               | 0.064                                     | 1                     | (0.8)  | 1                | 0.009                                     |
| Anaphylactic reaction                                       | 8                          | (3.4)  | 10               | 0.042                                     | 1                     | (0.8)  | 1                | 0.009                                     |
| Non-anaphylactic hypersensitivity reaction                  | 4                          | (1.7)  | 5                | 0.021                                     | 0                     | 0      | 0                | 0                                         |
| <b>Eye disorders</b>                                        | 8                          | (3.4)  | 9                | 0.038                                     | 1                     | (0.8)  | 1                | 0.009                                     |

| System Organ Class Preferred Term                                             | Peanut Patch 250µg (n=238) |        |                  |                                           | Placebo Patch (n=118) |        |                  |                                           |
|-------------------------------------------------------------------------------|----------------------------|--------|------------------|-------------------------------------------|-----------------------|--------|------------------|-------------------------------------------|
|                                                                               | No.                        | (%)    | Number of Events | Exposure adjusted Event Rate <sup>b</sup> | No.                   | (%)    | Number of Events | Exposure adjusted Event Rate <sup>b</sup> |
| Conjunctivitis allergic                                                       | 4                          | (1.7)  | 4                | 0.017                                     | 1                     | (0.8)  | 1                | 0.009                                     |
| Eye pruritus                                                                  | 2                          | (0.8)  | 2                | 0.008                                     | 0                     | 0      | 0                | 0                                         |
| Eye swelling                                                                  | 2                          | (0.8)  | 2                | 0.008                                     | 0                     | 0      | 0                | 0                                         |
| Periorbital edema                                                             | 1                          | (0.4)  | 1                | 0.004                                     | 0                     | 0      | 0                | 0                                         |
| <b>Infections and infestations</b>                                            | 6                          | (2.5)  | 9                | 0.038                                     | 0                     | 0      | 0                | 0                                         |
| Application site folliculitis                                                 | 2                          | (0.8)  | 2                | 0.008                                     | 0                     | 0      | 0                | 0                                         |
| Conjunctivitis                                                                | 2                          | (0.8)  | 3                | 0.013                                     | 0                     | 0      | 0                | 0                                         |
| Application site infection                                                    | 1                          | (0.4)  | 2                | 0.008                                     | 0                     | 0      | 0                | 0                                         |
| Eczema infected                                                               | 1                          | (0.4)  | 2                | 0.008                                     | 0                     | 0      | 0                | 0                                         |
| <b>Respiratory, thoracic and mediastinal disorders</b>                        | 3                          | (1.3)  | 7                | 0.03                                      | 2                     | (1.7)  | 2                | 0.017                                     |
| Nasal congestion                                                              | 1                          | (0.4)  | 1                | 0.004                                     | 0                     | 0      | 0                | 0                                         |
| Pharyngeal edema                                                              | 1                          | (0.4)  | 1                | 0.004                                     | 0                     | 0      | 0                | 0                                         |
| Rhinitis allergic                                                             | 1                          | (0.4)  | 2                | 0.008                                     | 0                     | 0      | 0                | 0                                         |
| Throat irritation                                                             | 1                          | (0.4)  | 3                | 0.013                                     | 0                     | 0      | 0                | 0                                         |
| Dyspnea                                                                       | 0                          | 0      | 0                | 0                                         | 1                     | (0.8)  | 1                | 0.009                                     |
| Wheezing                                                                      | 0                          | 0      | 0                | 0                                         | 1                     | (0.8)  | 1                | 0.009                                     |
| <b>Psychiatric disorders</b>                                                  | 1                          | (0.4)  | 1                | 0.004                                     | 1                     | (0.8)  | 1                | 0.009                                     |
| Insomnia                                                                      | 1                          | (0.4)  | 1                | 0.004                                     | 0                     | 0      | 0                | 0                                         |
| Anxiety                                                                       | 0                          | 0      | 0                | 0                                         | 1                     | (0.8)  | 1                | 0.009                                     |
| <b>Vascular disorders</b>                                                     | 1                          | (0.4)  | 1                | 0.004                                     | 0                     | 0      | 0                | 0                                         |
| Flushing                                                                      | 1                          | (0.4)  | 1                | 0.004                                     | 0                     | 0      | 0                | 0                                         |
| <b>Serious TEAE considered related to patch</b>                               | 3                          | (1.3)  | 4                | 0.017                                     | 0                     | 0      | 0                | 0                                         |
| <b>Severe TEAE considered related to patch</b>                                | 8                          | (3.4)  | 30               | 0.127                                     | 1                     | (0.8)  | 1                | 0.009                                     |
| <b>Moderate TEAE considered related to patch</b>                              | 51                         | (21.4) | 161              | 0.683                                     | 5                     | (4.2)  | 14               | 0.122                                     |
| <b>Mild TEAE considered related to patch</b>                                  | 121                        | (50.8) | 378              | 1.603                                     | 40                    | (33.9) | 142              | 1.233                                     |
| <b>TEAEs considered related to patch leading to temporary discontinuation</b> | 16                         | (6.7)  | 26               | 0.110                                     | 2                     | (1.7)  | 3                | 0.026                                     |
| <b>TEAEs considered related to patch leading to permanent discontinuation</b> | 4                          | (1.7)  | 4                | 0.017                                     | 0                     | 0      | 0                | 0                                         |

Abbreviations: n, number of participants in treatment group; TEAE, treatment-emergent adverse event.

<sup>a</sup> Adverse Events reported as Possibly related, Probably related or Related are considered as Related. Adverse Events reported as Unlikely related or Unrelated are considered as Unrelated.

<sup>b</sup> Exposure adjusted event rate based on the number of events divided by the total exposure of participants (235.8 patient-year for Peanut-Patch Group and 115.2 for Placebo Group)

<sup>c</sup> Swelling, Pruritus and Erythema (swelling, itching and redness) were to be reported as an adverse event after the first 6 months and in participant diaries on a daily basis during the first 6 months.

The following categories had no related reported TEAE's: nervous system disorders; injury, poison, and procedural complications; musculoskeletal and connective tissue disorders; ear and labyrinth disorders; neoplasms; metabolism and nutrition disorders; blood and lymphatic disorders; congenital, familial, and genetic disorders; hepatobiliary disorders; renal and urinary disorders; reproductive system and breast disorders; surgical and medical procedures; social circumstances.

**eTable 7. Summary of Possibly Related, Probably Related, or Related Anaphylaxis Events Occurring in Peanut-Patch Participants**

| Patient No. | Treatment Relationship | Symptoms <sup>a</sup>                                         | Study Day | Time of onset after last patch application <sup>a</sup> | Severity | SAE | Serious (Yes/No) /seriousness criteria   | Epinephrine Administered | Additional Treatment                               | Continued Study  | Disposition Regarding Patch <sup>a</sup>                                                                         |
|-------------|------------------------|---------------------------------------------------------------|-----------|---------------------------------------------------------|----------|-----|------------------------------------------|--------------------------|----------------------------------------------------|------------------|------------------------------------------------------------------------------------------------------------------|
| 1           | Probable               | Urticaria, Cough, Vomiting, Lip Swelling                      | 5         | 10 hours 15 min                                         | Mild     | No  | No                                       | Yes (1 dose)             | Diphenhydramine                                    | No               | Patch permanently withdrawn the day of AE. Next visit, 4 days later, with parental consent withdrawal due to AE. |
| 2           | Possible               | Urticaria, Itchy Throat, Dyspnea                              | 16        | 1 hour 50 min                                           | Moderate | Yes | Yes / Hospitalization less than 24 hours | Yes (1 dose)             | Dimetindene, Betamethasone, IVF                    | Yes (to Day 349) | Temporary withdrawn for 11 days                                                                                  |
| 2           | Probable               | Urticaria, Dyspnea                                            | 83        | 2 hours and 45 min                                      | Moderate | No  | No                                       | No                       | Dimetindene, Salbutamol, Betamethasone             | Yes (to Day 349) | Temporary withdrawn for 9 days                                                                                   |
| 2           | Possible               | Urticaria, Itchy Throat, Wheeze                               | 349       | 4 hours and 20 min                                      | Moderate | Yes | Yes / Hospitalization less than 24 hours | No                       | Dimetindene, Salbutamol, Prednisone, Betamethasone | No               | Temporarily interrupted for 2 days, restart few hours a day for 5 weeks and drop out due to AE                   |
| 3           | Possible               | Urticaria, Angioedema, Cough, Wheeze, Dyspnea, Conjunctivitis | 9         | 30 min                                                  | Moderate | Yes | Yes / Hospitalization less than 24 hours | Yes (1 dose)             | Cetirizine, Salbutamol, Prednisolone               | No               | Drop out due to AE the same day                                                                                  |

| Patient No. | Treatment Relationship | Symptoms <sup>a</sup>                                          | Study Day | Time of onset after last patch application <sup>a</sup> | Severity | SAE | Serious (Yes/No) /seriousness criteria | Epinephrine Administered | Additional Treatment                             | Continued Study | Disposition Regarding Patch <sup>a</sup>                                                                                                                                                                     |
|-------------|------------------------|----------------------------------------------------------------|-----------|---------------------------------------------------------|----------|-----|----------------------------------------|--------------------------|--------------------------------------------------|-----------------|--------------------------------------------------------------------------------------------------------------------------------------------------------------------------------------------------------------|
| 4           | Possible               | Urticaria, Angioedema, Cough, Wheeze, Dyspnea, Conjunctivitis  | 17        | 1 hour                                                  | Moderate | No  | No                                     | No                       | Cetirizine, Salbutamol, Prednisolone, Budesonide | Yes             | Temporarily withdrawn for 1 month because the site wanted the participant to restart peanut-patch at the site, the family lived far away, and the restart plan was delayed by an underlying febrile illness. |
| 5           | Probable               | Urticaria, Cough                                               | 20        | 1 hour                                                  | Moderate | Yes | Yes / Medically significant            | Yes (1 dose)             | Diphenhydramine, Albuterol, Dexamethasone        | Yes             | Temporarily interrupted for 1 day                                                                                                                                                                            |
| 6           | Possible               | Urticaria, Pruritus, Vomiting                                  | 162       | 18 hours                                                | Moderate | No  | No                                     | Yes (1 dose)             | Diphenhydramine, Cetirizine                      | Yes             | Patch maintained, no interruption                                                                                                                                                                            |
| 7           | Related                | Wheezing, Nausea, Mouth Tingling, Sweating, Flushing, Lethargy | 17        | Immediately after 2nd patch same day                    | Moderate | No  | No                                     | Yes (1 dose)             | Diphenhydramine, Salbutamol, Prednisolone        | Yes             | Temporarily interrupted for 24 hours                                                                                                                                                                         |
| 8           | Possible               | Vomiting, Conjunctivitis, Nasal Congestion                     | 107       | Around 21 hours                                         | Mild     | No  | No                                     | No                       | Paracetamol, Ondansetron                         | Yes             | Temporarily interrupted for 2 days                                                                                                                                                                           |

Abbreviations: AE, adverse event; ER, emergency room; IVF, intravenous fluids; SAE, serious adverse event.

<sup>a</sup>Data retrieved based on Case Medical Narratives.
