# Supplementary material
Source: PubMed Central journal article supplement (PMC6439674)
Supplement: jama-321-946-s004.pdf [file jama-321-946-s004.pdf]

## **Data Sharing Statement**

Fleischer. Effect of Epicutaneous Immunotherapy vs Placebo on Reaction to Peanut Protein Ingestion Among Children With Peanut Allergy. *JAMA*. Published February 22, 2019. 10.1001/jama.2019.1113

### **Data**

**Data available:** No
